# Supplementary material for: Construction of full-color-tunable and strongly emissive materials by functionalizing a boron-chelate four-ring-fused π-conjugated core
Source: Royal Society of Chemistry journal article supplement (doi:10.1039/c1jm14606h), 2011-12-16
Supplement: c1jm14606h.pdf [file c1jm14606h.pdf]

Electronic Supplementary Information

**Construction of Full-Color-Tunable and Strongly Emissive  
Materials by Functionalizing a Boron-Chelate  
Four-Ring-Fused  $\pi$ -Conjugated Core**

*Di Li, Hongyu Zhang,\* Chenguang Wang, Shuo Huang, Jianhua Guo and Yue Wang\**

State Key Laboratory of Supramolecular Structure and Materials, College of  
Chemistry, Jilin University, Changchun 130012, P. R. China. E-mail:  
[hongyuzhang@jlu.edu.cn](mailto:hongyuzhang@jlu.edu.cn) (H. Zhang); [yuewang@jlu.edu.cn](mailto:yuewang@jlu.edu.cn) (Y. Wang)

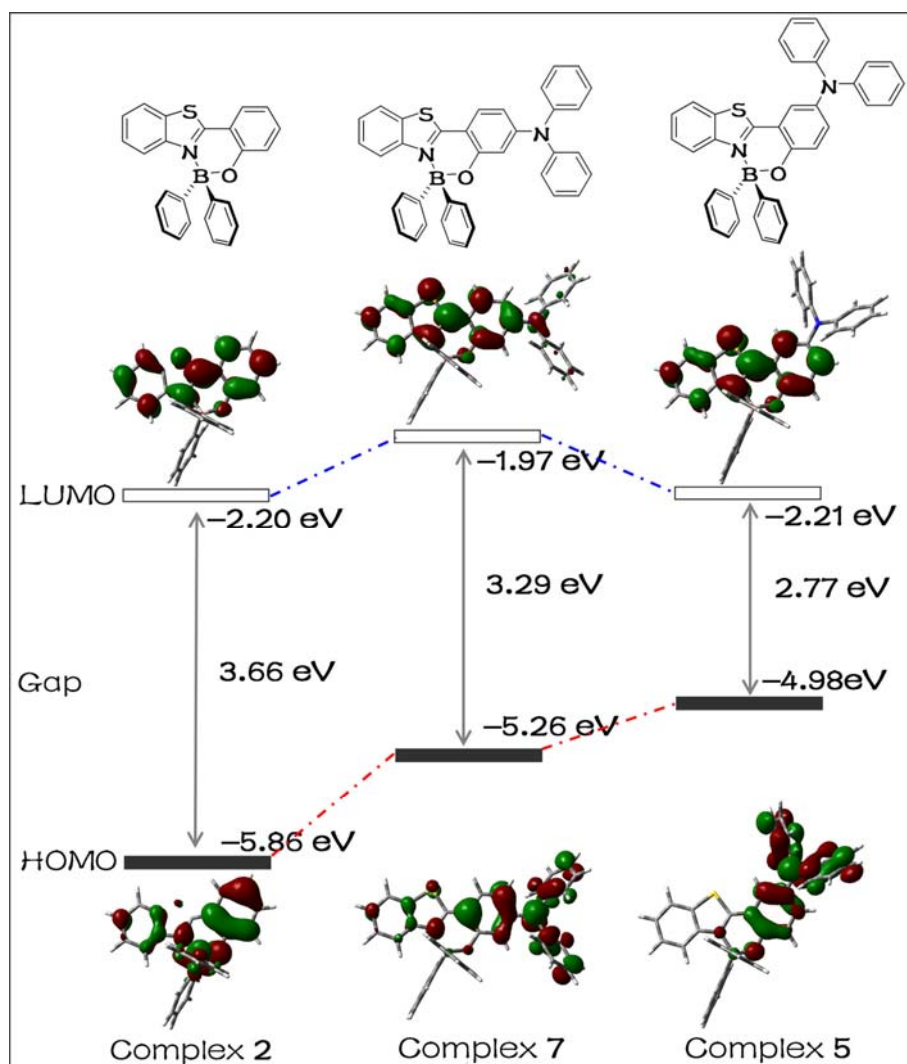

**Figure S1.** Comparison of molecular orbitals and energy levels among complexes 2, 5, and 7.

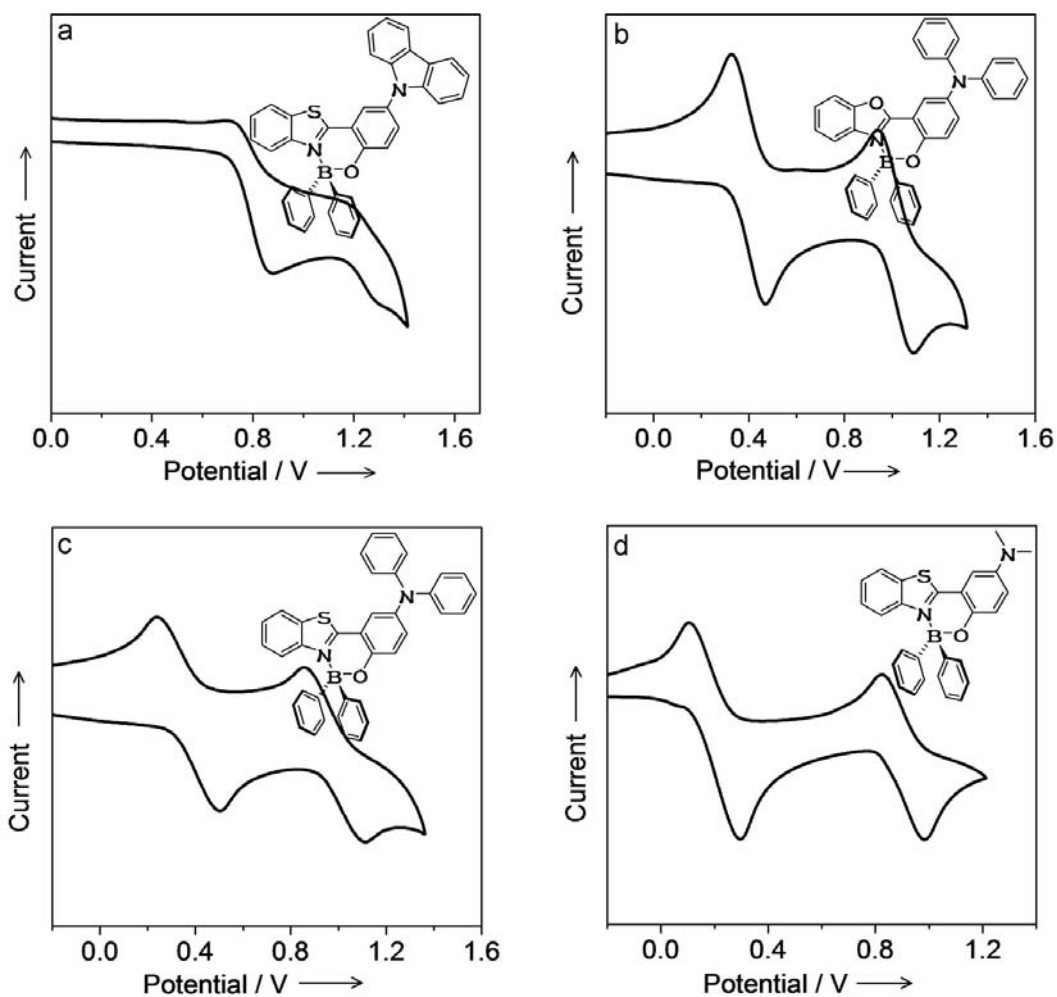

**Figure S2** Cyclic voltammograms of **3–6** in  $\text{CH}_2\text{Cl}_2$  (1 mM), measured with TBAP (0.1 M) as a supporting electrolyte at a scan rate of  $100 \text{ mV s}^{-1}$ .

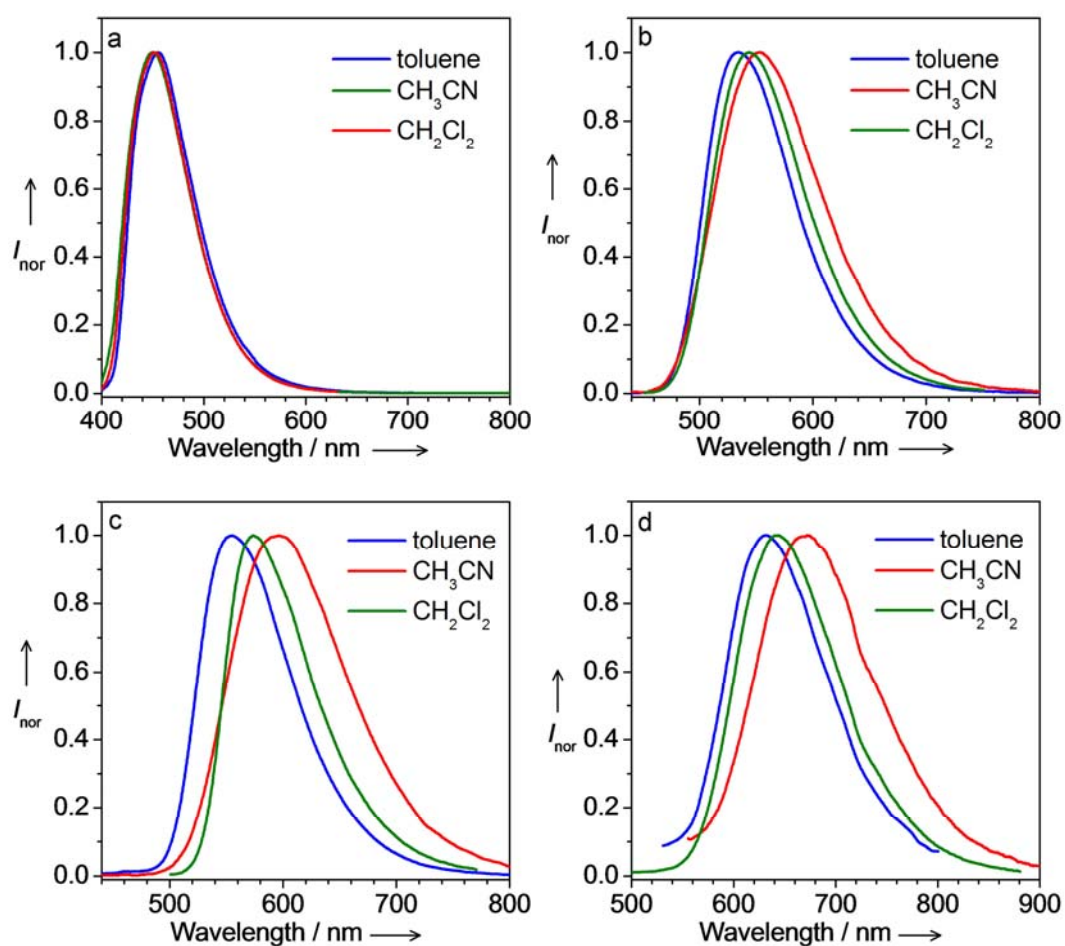

**Figure S3.** Solvatochromic behaviours of complexes **1**, **3**, **4**, and **6**.

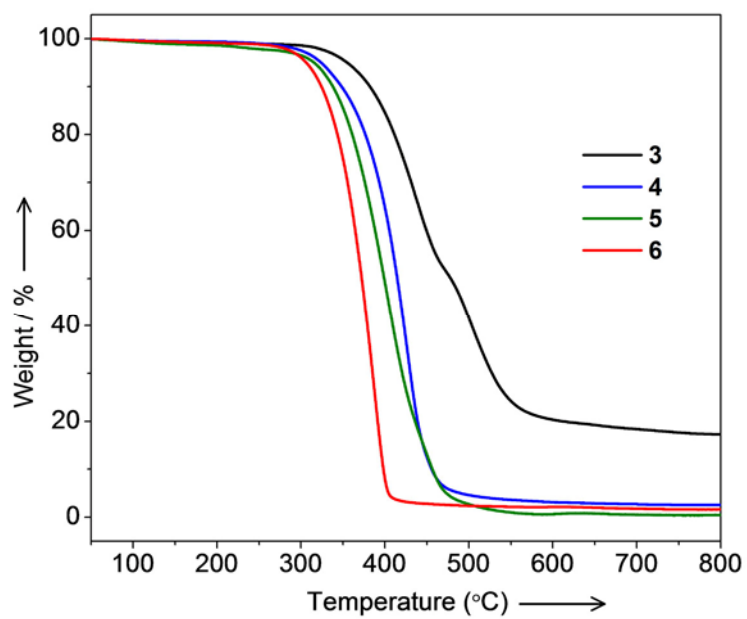

**Figure S4.** TGA curves of **3–6** at a heating rate of 10 °C/min.

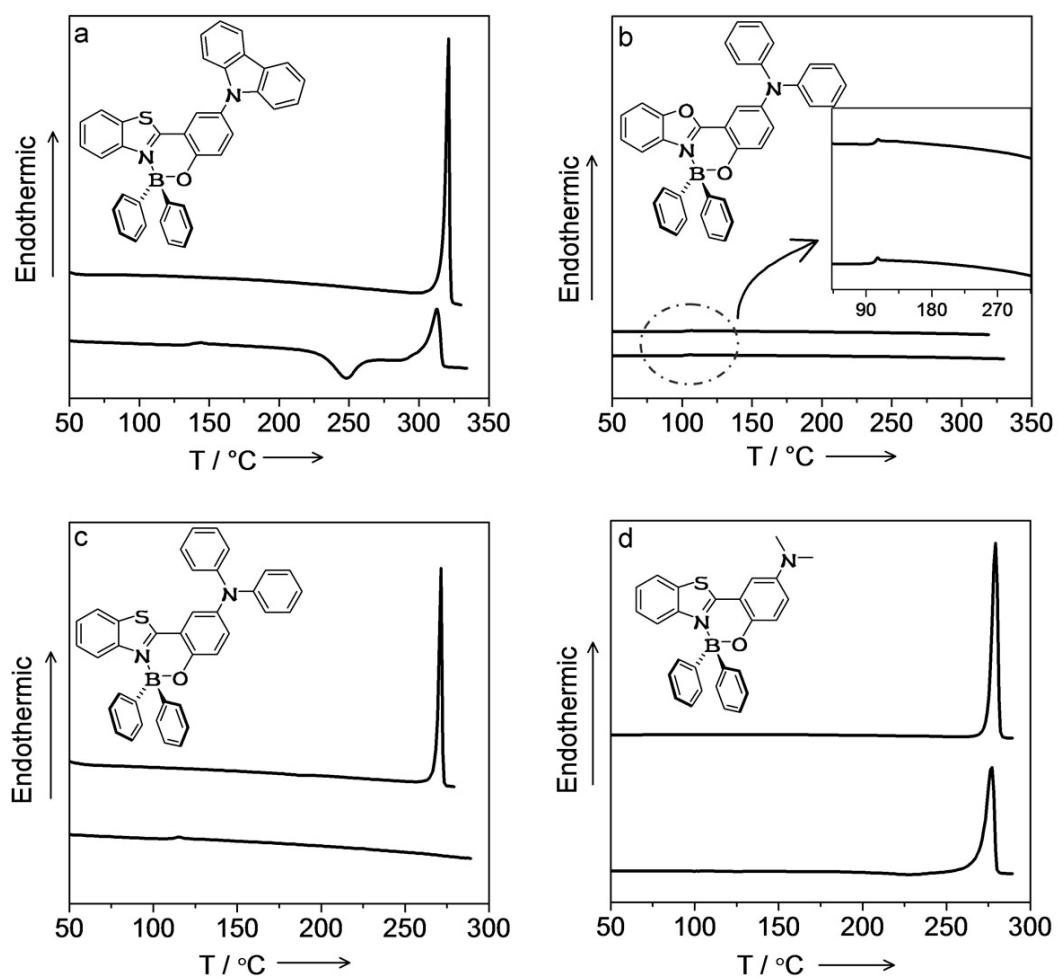

**Figure S5.** DSC curves of **3–6** at a heating rate of 10 °C/min.
